# Supplementary material
Source: PubMed Central journal article supplement (PMC3791732)
Supplement: 1305937110_pnas.201305937SI.pdf [file 1305937110_pnas.201305937SI.pdf]

# Supporting Information

Ghiaur et al. 10.1073/pnas.1305937110

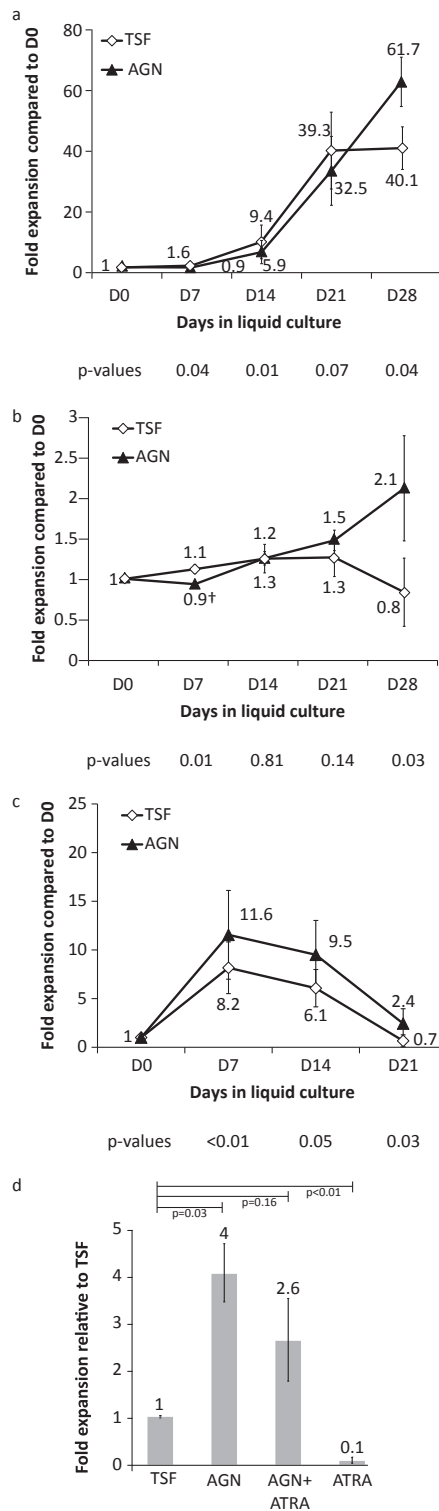

**Fig. S1.** Effects of inhibition of retinoic acid (RA) signaling on committed and primitive hematopoietic progenitor cells. CD34<sup>+</sup>CD38<sup>-</sup> cells were incubated with thrombopoietin, stem-cell factor, and Flt3-ligand (TSF) alone or with the addition of 1  $\mu$ M AGN194310 (AGN) and/or 0.1  $\mu$ M all-*trans* RA (ATRA). (A) Colony-  
Legend continued on following page



**Table S1. Target gene expression and predicted regulation by RA receptor  $\alpha$** 

| Gene symbol | Affymetrix transcript ID | Refseq ID    | Fold change* | Predicted regulation <sup>†</sup> (literature findings) |
|-------------|--------------------------|--------------|--------------|---------------------------------------------------------|
| RARB        | 2614369                  | NM_000965    | -1.217       | Up-regulates (74)                                       |
| RARA        | 3720921                  | NM_000964    | 1.758        | Up-regulates (24)                                       |
| CD38        | 2719656                  | NM_001775    | -1.410       | Up-regulates (10)                                       |
| POU5F1      | 2948863                  | NM_203289    | -1.438       | Up-regulates (10)                                       |
| SLC10A1     | 3570266                  | NM_003049    | -1.554       | Up-regulates (9)                                        |
| TRH         | 2641901                  | NM_007117    | -1.478       | Up-regulates (9)                                        |
| APOC3       | 3350655                  | NM_000040    | -1.139       | Up-regulates (8)                                        |
| RBP2        | 2697839                  | NM_004164    | -1.406       | Up-regulates (8)                                        |
| CRABP2      | 2438458                  | NM_001878    | -1.181       | Up-regulates (7)                                        |
| PENK        | 3136271                  | NM_001135690 | -1.040       | Up-regulates (6)                                        |
| SFTPB       | 2562435                  | NM_000542    | -1.337       | Up-regulates (6)                                        |
| MAOB        | 4006210                  | NM_000898    | -1.254       | Up-regulates (5)                                        |
| DRD2        | 3391653                  | NM_000795    | -1.068       | Up-regulates (4)                                        |
| EGR1        | 2830861                  | NM_001964    | 1.637        | Up-regulates (4)                                        |
| ALDH1A1     | 3209726                  | NM_000689    | 4.860        | Up-regulates (3)                                        |
| CNGA2       | 3995105                  | NM_005140    | -1.251       | Up-regulates (3)                                        |
| RBP1        | 2697863                  | NM_001130992 | -1.051       | Up-regulates (3)                                        |
| EPO         | 3015778                  | NM_000799    | -1.226       | Up-regulates (2)                                        |
| FOLR2       | 3339382                  | NM_000803    | -1.220       | Up-regulates (2)                                        |
| HNF1B       | 3754797                  | NM_000458    | -1.179       | Up-regulates (2)                                        |
| HOXA1       | 3042730                  | NM_005522    | -1.161       | Up-regulates (2)                                        |
| KIRREL2     | 3830925                  | NM_199180    | -1.297       | Up-regulates (2)                                        |
| MMP11       | 3939470                  | NM_005940    | -1.178       | Up-regulates (2)                                        |
| NEDD9       | 2941784                  | NM_001142393 | -1.190       | Up-regulates (2)                                        |
| RET         | 3243846                  | NM_020975    | -1.111       | Up-regulates (2)                                        |
| TP63        | 2657665                  | NM_003722    | -1.166       | Up-regulates (2)                                        |
| TSHB        | 2353067                  | NM_000549    | -1.100       | Up-regulates (2)                                        |
| ACACA       | 3754469                  | NM_198839    | -1.180       | Up-regulates (1)                                        |
| ALDH1A2     | 3626312                  | NM_003888    | -1.185       | Up-regulates (1)                                        |
| CDX1        | 2835368                  | NM_001804    | -1.060       | Up-regulates (1)                                        |
| CEBPB       | 3888613                  | NM_005194    | 1.048        | Up-regulates (1)                                        |
| CLMN        | 3577940                  | NM_024734    | -1.189       | Up-regulates (1)                                        |
| DUSP1       | 2887309                  | NM_004417    | 2.123        | Up-regulates (1)                                        |
| FOXP3       | 4008011                  | NM_014009    | -1.141       | Up-regulates (1)                                        |
| GAP43       | 2637112                  | NM_001130064 | -1.249       | Up-regulates (1)                                        |
| GATA4       | 3086100                  | NM_002052    | -1.130       | Up-regulates (1)                                        |
| HOXA3       | 3042777                  | NM_153631    | 1.095        | Up-regulates (1)                                        |
| HOXA4       | 3042816                  | NM_002141    | 1.193        | Up-regulates (1)                                        |
| HOXD10      | 2516834                  | NM_002148    | -1.268       | Up-regulates (1)                                        |
| IL13        | 2828688                  | NM_002188    | -1.325       | Up-regulates (1)                                        |
| IL4         | 2828699                  | NM_000589    | -1.243       | Up-regulates (1)                                        |
| IL5         | 2875384                  | NM_000879    | -1.106       | Up-regulates (1)                                        |
| IRF1        | 2875348                  | NM_002198    | 1.021        | Up-regulates (1)                                        |
| JUP         | 3757329                  | NM_002230    | 1.467        | Up-regulates (1)                                        |
| MAFB        | 3905875                  | NM_005461    | -1.009       | Up-regulates (1)                                        |
| MYCN        | 2470805                  | NM_005378    | -1.033       | Up-regulates (1)                                        |
| MYCN        | 2470838                  | NM_005378    | -1.033       | Up-regulates (1)                                        |
| NAV2        | 3323052                  | NM_182964    | -1.181       | Up-regulates (1)                                        |
| NTRK1       | 2361761                  | NM_001007792 | -1.140       | Up-regulates (1)                                        |
| OAS1        | 3432438                  | NM_016816    | 1.649        | Up-regulates (1)                                        |
| PCK1        | 3890640                  | NM_002591    | -1.247       | Up-regulates (1)                                        |
| SMPD1       | 3318666                  | NM_000543    | 1.032        | Up-regulates (1)                                        |
| STAT1       | 2592268                  | NM_007315    | -1.019       | Up-regulates (1)                                        |
| STRA6       | 3632806                  | NM_022369    | -1.265       | Up-regulates (1)                                        |
| TH          | 3359180                  | NM_199292    | -1.217       | Up-regulates (1)                                        |
| OXT         | 3874198                  | NM_000915    | -1.015       | Regulates (9)                                           |
| CXCR5       | 3351675                  | NM_001716    | -1.182       | Regulates (7)                                           |
| THBD        | 3901041                  | NM_000361    | -1.166       | Regulates (7)                                           |
| CDKN1A      | 2905169                  | NR_037150    | 2.607        | Regulates (6)                                           |
| NR2C1       | 3466318                  | NM_003297    | -2.061       | Regulates (5)                                           |
| LTF         | 2672140                  | NM_002343    | -1.130       | Regulates (4)                                           |
| TG          | 3116614                  | NM_003235    | 1.210        | Regulates (4)                                           |
| APOA1       | 3392986                  | NM_000039    | -1.189       | Regulates (3)                                           |



**Table S2. Limiting dilution analysis of NOD/SCID-IL-2R $\gamma^{-/-}$  (NSG) engraftment**

| Group   | Cell dosage | +/total | SRC frequency | <i>P</i> vs. D0 | <i>P</i> vs. TSF |
|---------|-------------|---------|---------------|-----------------|------------------|
| D0      | 2,000       | 10/14   | 1:1,758       |                 | —                |
|         | 500         | 3/15    |               |                 |                  |
| D7 TSF  | 2,000       | 8/10    | 1:1,352       | 0.5             | —                |
|         | 1,524       | 4/5     |               |                 |                  |
|         | 500         | 2/10    |               |                 |                  |
|         | 381         | 1/5     |               |                 |                  |
| D7 AGN  | 2,000       | 10/10   | 1:444         | <0.01           | <0.01            |
|         | 1,524       | 5/5     |               |                 |                  |
|         | 500         | 6/10    |               |                 |                  |
|         | 381         | 3/5     |               |                 |                  |
| D14 TSF | 2,000       | 4/15    | 1:4,636       | 0.04            | —                |
|         | 500         | 3/15    |               |                 |                  |
| D14 AGN | 2,000       | 12/15   | 1: 1,142      | 0.26            | <0.01            |
|         | 500         | 6/15    |               |                 |                  |
| D21 TSF | 2,000       | 2/10    | 1:11,471      | 0.01            | —                |
|         | 500         | 0/10    |               |                 |                  |
| D21 AGN | 2,000       | 4/10    | 1:5,186       | 0.06            | 0.35             |
|         | 500         | 0/10    |               |                 |                  |

For primary recipient, NSG engraftment results are pooled from three independent experiments. Several doses (high: 1,524 or 2,000 and low: 381 or 500) of CD34<sup>+</sup>CD38<sup>-</sup> cells or their progeny after liquid culture were transplanted into sublethally irradiated NSG mice. A level of at least 0.1% of human CD45<sup>+</sup> cells in the bone marrow of transplanted recipients at 18-20 wk after transplant was used as a cut off for positive animals. Poisson statistics were used to determine the *P* value. AGN, AGN194310; D, day; SRC, SCID-repopulating cells; TSF, thrombopoietin, stem-cell factor, and Flt3 ligand.

**Table S3. Secondary NSG transplants**

| Primary recipient cell dose | D0  | D7 secondary recipients (+/total) |     | D14 secondary recipients (+/total) |     |
|-----------------------------|-----|-----------------------------------|-----|------------------------------------|-----|
|                             |     | TSF                               | AGN | TSF                                | AGN |
| High                        | 3/5 | 3/5                               | 5/5 | 0/5                                | 2/5 |
| Low                         | 1/5 | 1/5                               | 2/5 | 0/5                                | 1/5 |

For secondary recipients, one-tenth of the femur cellularity of primary recipients positive for human engraftment was transplanted into secondary recipients. Data were analyzed 18 wk after transplant. AGN, AGN194310; D, day; TSF, thrombopoietin, stem-cell factor, and Flt3-ligand.
